# Supplementary material
Source: PubMed Central journal article supplement (PMC3197453)

## SUPPLEMENTARY DATA

FIG. S1. Leaf density (LD) predicts leaf dry matter content (LDMC).

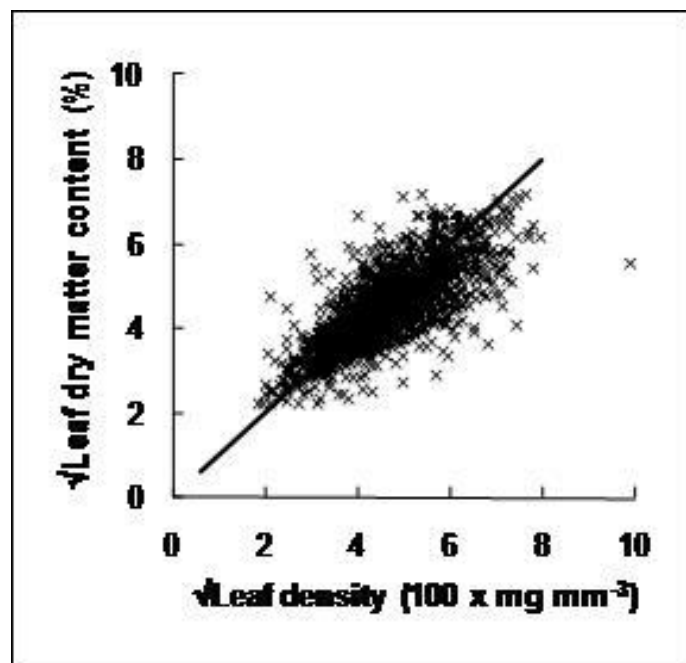

FIG. S2. (A) Leaf dry matter content (LDMC), (B) leaf thickness (LT), (C) LDMC  $\times$  LT, and (D) leaf size (LA) as predictors of specific leaf area (SLA).

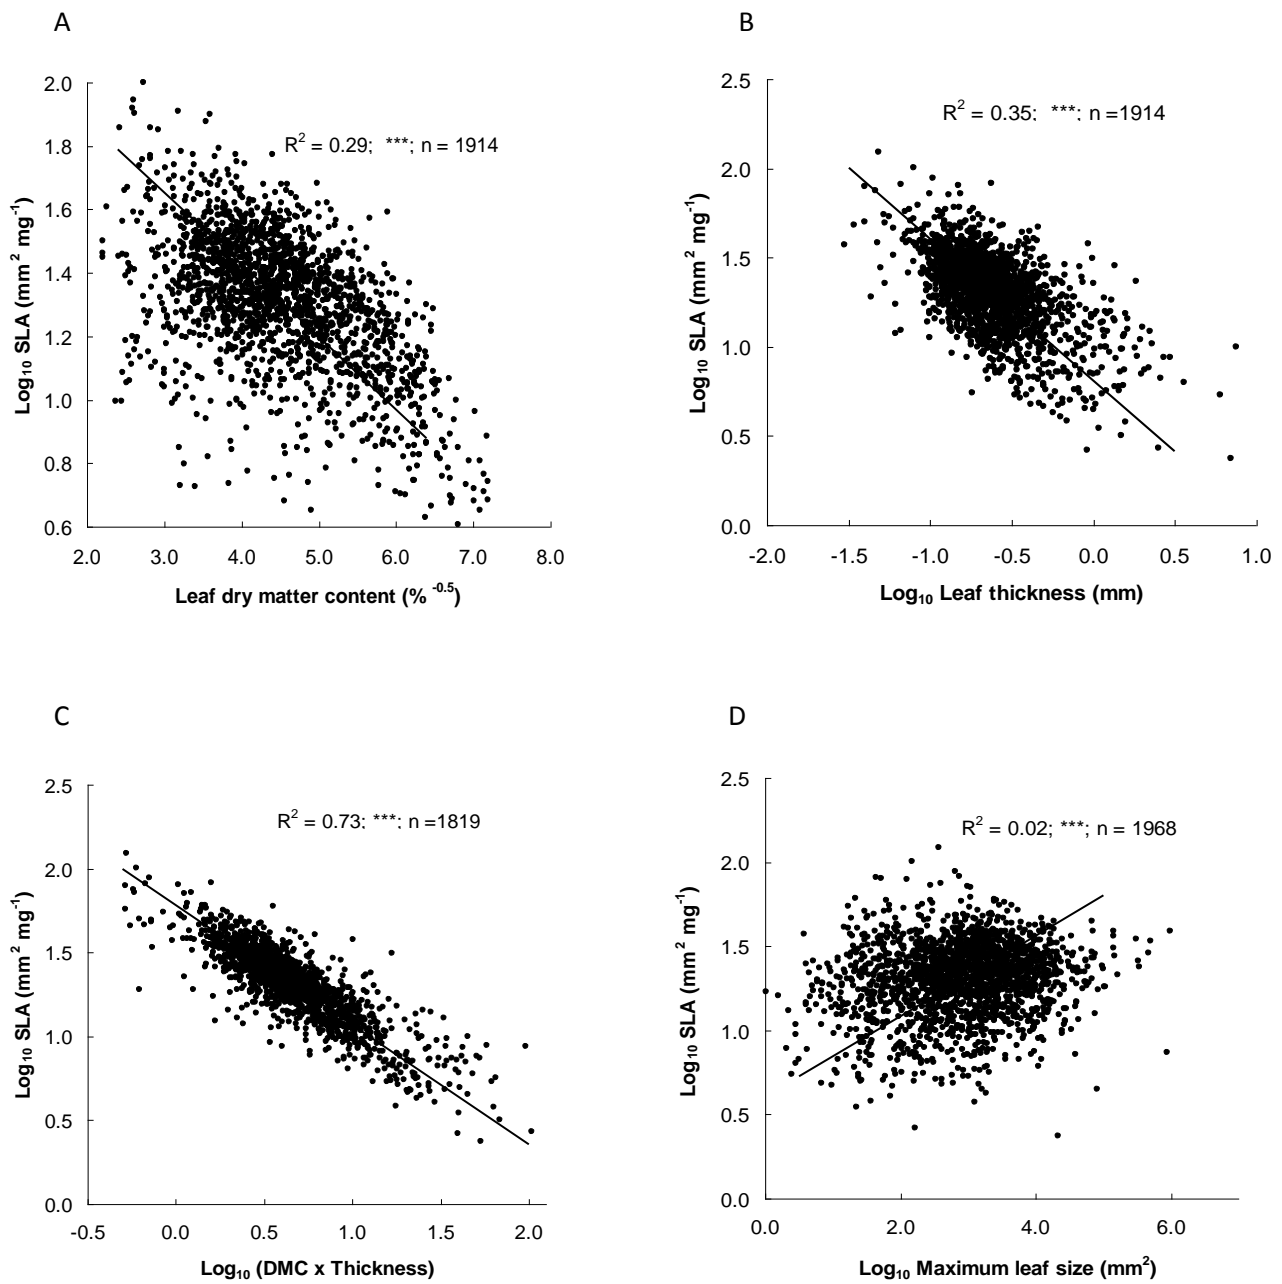

Supplement: supp_mcr225_mcr225supp.pdf [file supp_mcr225_mcr225supp.pdf]
